# Supplementary material for: Endothelial-derived extracellular matrix ameliorate the stemness deprivation during ex vivo expansion of mouse bone marrow-derived mesenchymal stem cells
Source: PLoS One. 2017 Aug 30;12(8):e0184111. doi: 10.1371/journal.pone.0184111 (PMC5576725; doi:10.1371/journal.pone.0184111)
Supplement: S2 Table — (DOC) [file pone.0184111.s002.doc]

**S2 Table.**  Detail results of statistical analyses (One-way ANOVA with Tukey’s post-test; n = 8) on proliferation at Day 12 and 15 of passage 2

| P2 | | | Day 12 | | | | | | Day 12 |
| --- | --- | --- | --- | --- | --- | --- | --- | --- | --- |
| Ctrl | CM | | ECM | | |
| AEC | MS1 | MSC | AEC | MS1 |
| Day 15 | Ctrl | |  | ns | ns | ** | ns | ns |
| CM | AEC | ns |  | ns | * | ns | ns |
| MS1 | ns | ns |  | *** | ns | ns |
| ECM | MSC | ns | ns | ns |  | ns | ** |
| AEC | ns | ns | ns | ns |  | ns |
| MS1 | ns | ns | ns | ns | ns |  |
| Day 15 | | | | | | | |  |
